# Supplementary material for: Natural near field coupled leaky-mode resonant anti-reflection structures: the setae of Cataglyphis bombycina
Source: Frontiers journal article supplement (doi:10.3389/fphy.2024.1393279), 2024-05-22
Supplement: Data_Sheet_1.docx [file Data_Sheet_1.docx]

Supplementary Material

# Complex refractive index of chitin from absorption data

Since the absorption of the seta in MIR range has an influence on the refractive index of the seta, the complex refractive index was determined from the absorbance of the chitin in MIR. For this, we measured the transmission and reflection spectra of a thin flat sample (dragonfly wing membrane) in combination with the reflectance of a polished thick ant cuticle sample (the detailed optical method is described in [1]), assuming the chemical compositions of the two samples are the same. With the measured thickness of the wing membrane, we calculated the absorptivity and extinction coefficient () of the cuticular material. The dispersion curve of was fitted with a Lorentz-model with 8 resonance frequencies and . The fitted data is plotted in Supplementary Figure 1. Despite limiting our model to 8 resonance frequencies, the fitted imaginary part (blue dashed) fits well with the determined extinction data (blue). The resulting real part (red) varies in the range of 1.5 to 1.62 due to the absorption bands.

Supplementary Figure 1. Extinction coefficient *k* fitted with the imaginary part Lorentz-model for the refractive index with 8 resonance frequencies. The resulting real part of the Lorenz-model is plotted on the right x axis.

**References**

1. Born M, Wolf E, Bhatia AB. Principles of optics: electromagnetic theory of propagation, interference, and diffraction of light. Seventh (expanded) anniversary edition, 60th anniversary edition. Cambridge: Cambridge University Press (2019)
